# Supplementary material
Source: PubMed Central journal article supplement (PMC1440836)

RNAP core/ $\sigma$

WT/gp55

$\Delta$ FTH/gp55

Step 1

-      -    33   -      -    33

time

20 min

Step 2

-      -   -   33      -   -

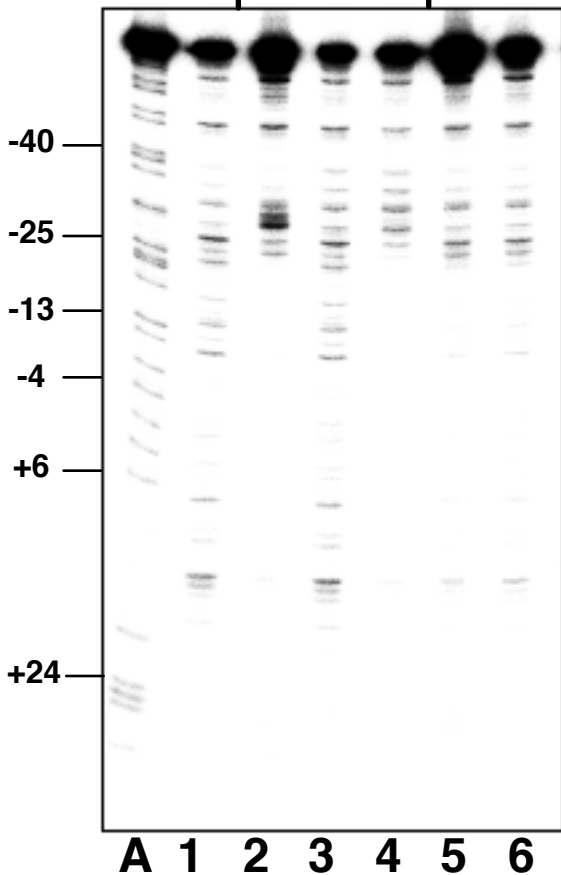

Sup 1

Supplement: 7601069s1.pdf [file 7601069s1.pdf]

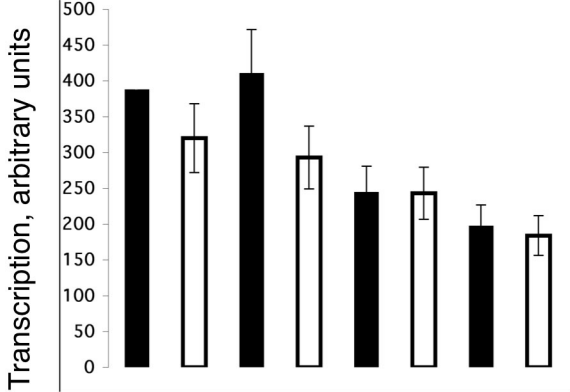

| RNAP core: | WT |   |   |   | ΔFTH |   |   |   |
|------------|----|---|---|---|------|---|---|---|
| gp55:      | -  | + | - | + | -    | + | - | + |
| gp33:      | -  | + | - | + | -    | + | - | + |

**Sup 2**

Supplement: 7601069s2.pdf [file 7601069s2.pdf]

| WT core | - |   | + |      |   |                         |   |
|---------|---|---|---|------|---|-------------------------|---|
| Sigma   | - | - |   | gp55 |   | $\sigma^{70}\Delta 4.2$ |   |
| gp33    | - | - | + | -    | + | -                       | + |

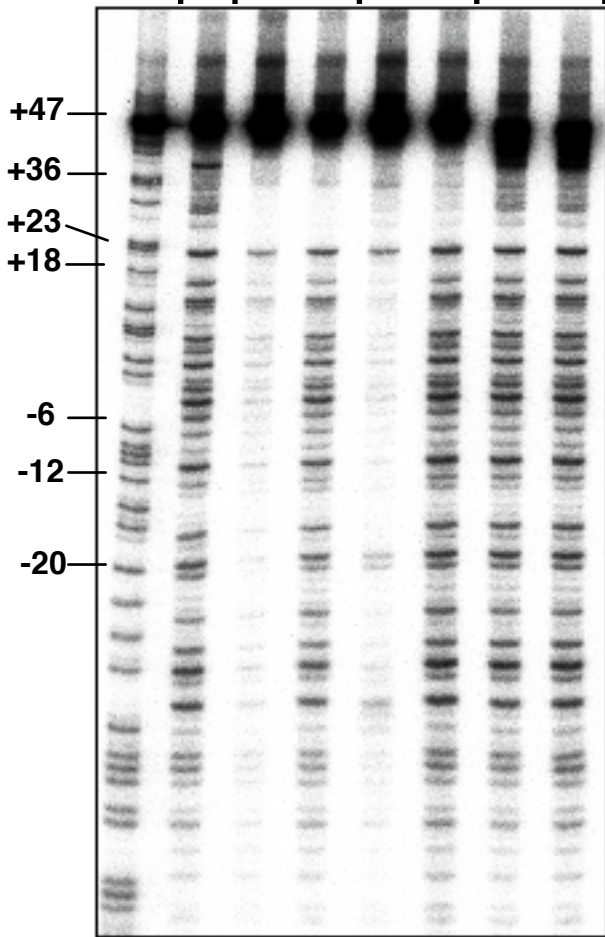

**Sup 3**

**A 1 2 3 4 5 6 7**

Supplement: 7601069s3.pdf [file 7601069s3.pdf]
